# Supplementary material for: pH-controlled polymorphism in a layered dysprosium phosphonate and its impact on the magnetization relaxation
Source: Royal Society of Chemistry journal article supplement (doi:10.1039/c4cc09341k), 2015-01-01
Supplement: c4cc09341k1.pdf [file c4cc09341k1.pdf]

## Supporting Information

### pH-Controlled polymorphism in a layered dysprosium phosphonate and its impact on the magnetization relaxation

Dai Zeng, Min Ren, Song-Song Bao, Jian-Shen Feng, Li Li and Li-Min Zheng\*

#### Experimental Section

**Materials and methods.** 2-quinolinephosphonic acid was prepared according to the literature method<sup>1</sup> and all the other starting materials were obtained from commercial sources without further purification. Elemental analyses for C, H and N were determined with a Perkin Elmer 240C elemental analyzer. The Dy contents in the doped samples were analyzed using Inductively Coupled Plasma Optical Emission Spectrometry (ICP OES-Optima 5300DV, PE.). Infrared spectra were measured using KBr pellets on a Bruker Tensor 27 spectrometer in the range of 400-4000 cm<sup>-1</sup>. Thermogravimetric analysis (TGA) were performed on a Mettler-Toledo TGA/DSC STARE thermal analyzer in the range of 25-600°C under a nitrogen flow at a heating rate of 5°C/min. Powder X-ray diffraction (PXRD) data were recorded on a Bruker D8 ADVANCE X-ray powder diffractometer (Cu-K $\alpha$ ) over the 2 $\theta$  range of 5 to 50° at room temperature. The magnetic susceptibility data were recorded on a Quantum Design MPMS SQUID VSM system. The diamagnetic contribution of the sample itself was estimated from Pascal's constant.<sup>2</sup>

**Synthesis of  $\alpha$ -Dy(C<sub>9</sub>H<sub>6</sub>NHPO<sub>3</sub>)(SO<sub>4</sub>)(H<sub>2</sub>O)<sub>2</sub> ( $\alpha$ -Dy):** A mixture of Dy(NO<sub>3</sub>)<sub>3</sub>·6H<sub>2</sub>O (0.0228 g, 0.05 mmol), ZnSO<sub>4</sub>·6H<sub>2</sub>O (0.0270 g, 0.10 mmol) and 2-quinolinephosphonic acid (0.0105 g, 0.05 mmol) in 6 mL of H<sub>2</sub>O, adjusted to pH 1.50 with 1 mol/L H<sub>2</sub>SO<sub>4</sub>, was kept in a Teflon-lined autoclave at 140 °C for 2 days. After cooling to room temperature, white polycrystalline powders of  $\alpha$ -Dy were obtained as a pure phase, confirmed by the powder XRD measurements. Yield: 60%. Elemental analysis calcd for  $\alpha$ -C<sub>9</sub>H<sub>11</sub>DyNO<sub>9</sub>PS: C, 21.50; H, 2.21; N, 2.79%. Found: C, 21.61; H, 2.48; N, 2.77%. IR (KBr, cm<sup>-1</sup>): 3355 (br), 1639 (m), 1599 (w), 1518 (w), 1486 (w), 1445 (w), 1404 (w), 1383 (w), 1348 (w), 1294 (m), 1164 (s), 1138 (s), 1104 (s), 1041 (s), 970 (s), 883 (w), 855(w), 828 (m), 776 (w), 658 (s), 637 (s), 606 (s), 533 (m), 476 (m), 419 (w). Thermal

analysis shows a weight loss of 7.0% below 250°C, close to the calculated value for the release of two coordination water molecules (7.1%).

**Synthesis of  $\beta$ -Dy(C<sub>9</sub>H<sub>6</sub>NHPO<sub>3</sub>)(SO<sub>4</sub>)(H<sub>2</sub>O)<sub>2</sub> ( $\beta$ -Dy):**  $\beta$ -Dy was obtained following a similar procedure as that for  $\alpha$ -Dy except that the pH was adjusted to 0.70. White polycrystalline powders of  $\beta$ -Dy were obtained as a pure phase, judged by the powder XRD measurements. Yield: 65%. Elemental analysis calcd for  $\beta$ -C<sub>9</sub>H<sub>11</sub>DyNO<sub>9</sub>PS: C, 21.50; H, 2.21; N, 2.79%. Found: C, 21.54; H, 2.58; N, 2.78%. IR (KBr, cm<sup>-1</sup>): 3479(m), 3356 (br), 3095 (w), 2355 (w), 1641 (m), 1599 (w), 1518 (w), 1486 (w), 1446 (w), 1405 (w), 1383 (w), 1348 (w), 1294 (m), 1167 (s), 1135 (s), 1103 (s), 1042 (s), 967 (s), 883 (w), 826 (m), 776 (w), 658 (s), 635 (s), 605 (s), 530 (m), 475 (m), 417 (w). Thermal analysis shows a weight loss of 7.4% below 250°C, close to the calculated value for the release of two coordination water molecules (7.1%).

**Synthesis of  $\alpha$ -Y(C<sub>9</sub>H<sub>6</sub>NHPO<sub>3</sub>)(SO<sub>4</sub>)(H<sub>2</sub>O)<sub>2</sub> ( $\alpha$ -Y):**  $\alpha$ -Y was obtained following a similar procedure as that for  $\alpha$ -Dy except that Y(NO<sub>3</sub>)<sub>3</sub>·6H<sub>2</sub>O (0.0192 g, 0.05 mmol) was used as the starting material instead of Dy(NO<sub>3</sub>)<sub>3</sub>·6H<sub>2</sub>O. White polycrystalline powders were obtained as a pure phase, judged by the PXRD measurements. Yield: 55%. Elemental analysis calcd for  $\alpha$ -C<sub>9</sub>H<sub>11</sub>YNO<sub>9</sub>PS: C, 25.19; H, 2.58; N, 3.26%. Found: C, 25.03; H, 2.81; N, 3.17%. IR (KBr, cm<sup>-1</sup>): 3484(m), 3356 (br), 3097 (w), 1643 (m), 1599 (w), 1520 (w), 1486 (w), 1445 (w), 1404 (w), 1384 (w), 1348 (w), 1294 (m), 1200 (s), 1167(s), 1135 (s), 1105 (s), 1044 (s), 971 (m), 949 (w), 885 (w), 856 (w), 828 (m), 781 (w), 769 (w), 660 (s), 637 (s), 608 (s), 593 (m), 534 (m), 476 (w), 418 (w). Thermal analysis shows a weight loss of 8.6% below 250°C, close to the calculated value for the release of two coordination water molecules (8.4%).

**Synthesis of  $\beta$ -Y(C<sub>9</sub>H<sub>6</sub>NHPO<sub>3</sub>)(SO<sub>4</sub>)(H<sub>2</sub>O)<sub>2</sub> ( $\beta$ -Y):**  $\beta$ -Y was obtained following a similar procedure as that for  $\beta$ -Dy except that Y(NO<sub>3</sub>)<sub>3</sub>·6H<sub>2</sub>O (0.0192 g, 0.05 mmol) was used as the starting material instead of Dy(NO<sub>3</sub>)<sub>3</sub>·6H<sub>2</sub>O. White polycrystalline powders were obtained as a pure phase, judged by the PXRD measurements. Yield: 42%. Elemental analysis calcd for  $\beta$ -C<sub>9</sub>H<sub>11</sub>YNO<sub>9</sub>PS: C, 25.19; H, 2.58; N, 3.26%. Found: C, 25.12; H, 2.80; N, 3.20%. IR (KBr, cm<sup>-1</sup>): 3486(m), 3306 (br), 1643 (m), 1599 (w), 1519 (w), 1486 (w), 1445 (w), 1404 (w), 1384 (w), 1347 (w), 1294 (w), 1200 (s), 1173(s), 1133 (s), 1105 (s), 1044 (s), 967 (m), 949 (w), 884 (w), 855 (w), 823 (m), 781 (w), 769

(w), 659 (m), 636 (m), 608 (m), 593 (m), 533 (m), 475 (w), 430 (w), 416 (w). Thermal analysis shows a weight loss of 8.7% below 250°C, close to the calculated value for the release of two coordination water molecules (8.4%).

**Synthesis of  $\alpha$ -Dy<sub>0.10</sub>Y<sub>0.90</sub>(C<sub>9</sub>H<sub>6</sub>NHPO<sub>3</sub>)(SO<sub>4</sub>)(H<sub>2</sub>O)<sub>2</sub> ( $\alpha$ -Dy<sub>0.10</sub>Y<sub>0.90</sub>):** A mixture of Dy(NO<sub>3</sub>)<sub>3</sub>·6H<sub>2</sub>O (0.0045 g, 0.01 mmol), Y(NO<sub>3</sub>)<sub>3</sub>·6H<sub>2</sub>O (0.0345 g, 0.09 mmol), ZnSO<sub>4</sub>·6H<sub>2</sub>O (0.0270 g, 0.1 mmol) and 2-quinolinephosphonic acid (0.0105 g, 0.05 mmol) in 6 mL of H<sub>2</sub>O, adjusted to pH 1.50 with 1 mol/L H<sub>2</sub>SO<sub>4</sub>, was kept in a Teflon-lined autoclave at 140 °C for 2 days. White polycrystalline powders were obtained after cooling to room temperature. Yield: 70%. Elemental analysis calcd for  $\alpha$ -C<sub>9</sub>H<sub>11</sub>Dy<sub>0.103</sub>Y<sub>0.897</sub>NO<sub>9</sub>PS: C, 24.75; H, 2.54; N, 3.21%. Found: C, 24.78; H, 3.02; N, 3.21 %. IR (KBr, cm<sup>-1</sup>): 3388 (br), 3097 (w), 1640 (m), 1600 (w), 1518 (w), 1486 (w), 1446 (w), 1404 (w), 1384 (w), 1348 (w), 1295 (w), 1165 (s), 1139 (s), 1106 (s), 1044 (s), 972 (s), 883 (w), 854(w), 828 (m), 776 (w), 660 (s), 637 (s), 606 (s), 534 (m), 475 (w), 420 (w). The amount of Dy<sup>III</sup> in  $\alpha$ -Dy<sub>0.10</sub>Y<sub>0.90</sub> (10.3 %) is confirmed by the inductively coupled plasma (ICP) measurements.

**Synthesis of  $\beta$ -Dy<sub>0.12</sub>Y<sub>0.88</sub>(C<sub>9</sub>H<sub>6</sub>NHPO<sub>3</sub>)(SO<sub>4</sub>)(H<sub>2</sub>O)<sub>2</sub> ( $\beta$ -Dy<sub>0.12</sub>Y<sub>0.88</sub>):** A mixture of Dy(NO<sub>3</sub>)<sub>3</sub>·6H<sub>2</sub>O (0.0045 g, 0.01 mmol), Y(NO<sub>3</sub>)<sub>3</sub>·6H<sub>2</sub>O (0.0345 g, 0.09 mmol), ZnSO<sub>4</sub>·6H<sub>2</sub>O (0.0270 g, 0.1 mmol) and 2-quinolinephosphonic acid (0.0105 g, 0.05 mmol) in 6 mL of H<sub>2</sub>O, adjusted to pH 0.70 with 1 mol/L H<sub>2</sub>SO<sub>4</sub>, was kept in a Teflon-lined autoclave at 140 °C for 2 days. White polycrystalline powders were obtained after cooling to room temperature. Yield: 57%. Elemental analysis calcd for  $\beta$ -C<sub>9</sub>H<sub>11</sub>Dy<sub>0.12</sub>Y<sub>0.88</sub>NO<sub>9</sub>PS: C, 24.68; H, 2.53; N, 3.20%. Found: C, 24.95; H, 2.69; N, 3.24%. IR (KBr, cm<sup>-1</sup>): 3486(s), 3298 (br), 1644 (m), 1599 (w), 1519 (w), 1488 (w), 1446 (w), 1403 (w), 1384 (w), 1346 (w), 1295 (w), 1199 (s), 1175 (s), 1143 (s), 1131 (s), 1104 (s), 1045 (s), 966 (m), 927 (w), 884 (w), 854(w), 843 (w), 821 (w), 780 (w), 768 (w), 665 (w), 634 (m), 607 (m), 592 (m), 532 (m), 492(w), 475 (w), 415(w). The amount of Dy<sup>III</sup> in  $\beta$ -DyY (11.7%) is confirmed by the inductively coupled plasma (ICP) measurements.

**Single-Crystal Structure Determination.** Single crystals of dimensions 0.20 × 0.20 × 0.05 mm<sup>3</sup> for  $\alpha$ -Dy, 0.10 × 0.05 × 0.05 mm<sup>3</sup> for  $\beta$ -Dy and 0.10 × 0.05 × 0.05 mm<sup>3</sup> for  $\beta$ -Y were mounted on a glass rod. The crystal data were collected on a Bruker SMART APEX II diffractometer using monochromated Mo-K $\alpha$  radiation ( $\lambda$  = 0.71073 Å) at 296

K for  **$\alpha$ -Dy**,  **$\beta$ -Dy** and  **$\beta$ -Y**. The structures were solved by direct methods and refined on  $F^2$  by full matrix least squares using SHELXTL.<sup>3</sup> All non-hydrogen atoms were refined anisotropically. All hydrogen atoms were either put in calculated positions or found from the difference Fourier maps and refined isotropically. Selected bond lengths and angles are given in Table S1.

**The Cole-Cole plot fitting method:** The *ac* magnetic susceptibilities can be described by the Cole-Cole plots using the generalized Debye model in Eq(S1), Eq(S2)<sup>4</sup> (single relaxation model) and/or a linear combination of two modified Debye models, as shown in Eq(S3) and Eq(S4)<sup>5</sup> (double relaxation model):

$$\chi'(\omega) = \chi_s + \frac{(\chi_T - \chi_s) [1 + (\omega\tau)^{1-\alpha} \sin(\pi\alpha/2)]}{1 + 2(\omega\tau)^{1-\alpha} \sin(\pi\alpha/2) + (\omega\tau)^{2(1-\alpha)}} \quad (S1)$$

$$\chi''(\omega) = \frac{(\chi_T - \chi_s) [1 + (\omega\tau)^{1-\alpha} \cos(\pi\alpha/2)]}{1 + 2(\omega\tau)^{1-\alpha} \sin(\pi\alpha/2) + (\omega\tau)^{2(1-\alpha)}} \quad (S2)$$

$$\chi'(\omega) = \chi_s + (\chi_T - \chi_s) \left( \frac{f_A [1 + (\omega\tau_A)^{1-\alpha_A} \sin(\pi\alpha_A/2)]}{1 + 2(\omega\tau_A)^{1-\alpha_A} \sin(\pi\alpha_A/2) + (\omega\tau_A)^{2(1-\alpha_A)}} + \frac{(1-f_A) [1 + (\omega\tau_B)^{1-\alpha_B} \sin(\pi\alpha_B/2)]}{1 + 2(\omega\tau_B)^{1-\alpha_B} \sin(\pi\alpha_B/2) + (\omega\tau_B)^{2(1-\alpha_B)}} \right) \quad (S3)$$

$$\chi'(\omega) = (\chi_T - \chi_s) \left( \frac{f_A [1 + (\omega\tau_A)^{1-\alpha_A} \cos(\pi\alpha_A/2)]}{1 + 2(\omega\tau_A)^{1-\alpha_A} \sin(\pi\alpha_A/2) + (\omega\tau_A)^{2(1-\alpha_A)}} + \frac{(1-f_A) [1 + (\omega\tau_B)^{1-\alpha_B} \cos(\pi\alpha_B/2)]}{1 + 2(\omega\tau_B)^{1-\alpha_B} \sin(\pi\alpha_B/2) + (\omega\tau_B)^{2(1-\alpha_B)}} \right) \quad (S4)$$

where  $\chi_s$  is the adiabatic susceptibility,  $\chi_T$  is the isothermal susceptibility, and  $\tau$  is the average relaxation time of magnetization, and the  $\alpha$  parameter, which ranges between 0 and 1, quantifies the width of the  $\tau$  distribution,  $f_A$  represents the percentage of relaxation A.

## References:

1. C. Xu, B. Liu, S.-S. Bao, Y. Chen, L.-M. Zheng, *Solid State Sci.*, 2007, **9**, 686-692.
2. O. Kahn, *Molecular Magnetism*, VCH Publishers, Inc., New York, **1993**.
3. SHELXTL (version 5.0), Reference Manual, Siemens Industrial Automation, Analytical Instruments Madison, WI, 1995.
4. D. Gatteschi, R. Sessoli, J. Villain, *Molecular Nanomagnets*, Oxford University, New York, 2006.
5. N. Domingo, F. Luis, M. Nakano, M. Muntó, J. Gómez, J. Chaboy, N. Ventosa, J. Campo, J. Veciana, D. Ruiz-Molina, *Phys Rev B* 2009, **79**, 214404

**Table S1.** Crystal data for compounds  **$\alpha$ -Dy**,  **$\beta$ -Dy** and  **$\beta$ -Y**.

|                                                                                            | $\alpha$ -Dy                                        | $\beta$ -Dy                                        | $\beta$ -Y                                         |
|--------------------------------------------------------------------------------------------|-----------------------------------------------------|----------------------------------------------------|----------------------------------------------------|
| Formula                                                                                    | C <sub>9</sub> H <sub>11</sub> DyNO <sub>9</sub> PS | C <sub>9</sub> H <sub>11</sub> DyNO <sub>9</sub> S | C <sub>9</sub> H <sub>11</sub> NO <sub>9</sub> PSY |
| Fw                                                                                         | 502.72                                              | 502.72                                             | 429.13                                             |
| crystal size                                                                               | 0.08×0.20×0.40                                      | 0.05×0.05×0.10                                     | 0.05×0.05×0.10                                     |
| Temperature (K)                                                                            | 296                                                 | 296                                                | 296                                                |
| crystal system                                                                             | monoclinic                                          | triclinic                                          | triclinic                                          |
| Space group                                                                                | <i>P</i> 2 <sub>1</sub> /c                          | <i>P</i> $\bar{1}$                                 | <i>P</i> $\bar{1}$                                 |
| <i>a</i> (Å)                                                                               | 13.3163(5)                                          | 6.792(3)                                           | 6.778(3)                                           |
| <i>b</i> (Å)                                                                               | 6.7704(3)                                           | 7.596(4)                                           | 7.572(3)                                           |
| <i>c</i> (Å)                                                                               | 15.0967(6)                                          | 13.368(6)                                          | 13.356(5)                                          |
| $\alpha$ (°)                                                                               |                                                     | 90.362(8)                                          | 90.423(6)                                          |
| $\beta$ (°)                                                                                | 90.6391(6)°                                         | 93.280(7)                                          | 93.298(7)                                          |
| $\gamma$ (°)                                                                               |                                                     | 102.383(7)                                         | 102.310(6)                                         |
| <i>V</i> (Å <sup>3</sup> )                                                                 | 1360.98(10)                                         | 672.4(5)                                           | 668.4(4)                                           |
| <i>Z</i>                                                                                   | 4                                                   | 2                                                  | 2                                                  |
| <i>D<sub>c</sub></i> (g cm <sup>-3</sup> )                                                 | 2.454                                               | 2.483                                              | 2.132                                              |
| $\mu$ (mm <sup>-1</sup> )                                                                  | 5.809                                               | 5.879                                              | 4.687                                              |
| <i>F</i> (000)                                                                             | 964                                                 | 482                                                | 428                                                |
| <i>R</i> <sub>1</sub> , <i>wR</i> <sub>2</sub> <sup>[a]</sup> [ <i>I</i> > 2σ( <i>I</i> )] | 0.0170, 0.0405                                      | 0.0354, 0.0910                                     | 0.0601, 0.1378                                     |
| <i>R</i> <sub>1</sub> , <i>wR</i> <sub>2</sub> <sup>[a]</sup> (all data)                   | 0.0188, 0.0415                                      | 0.0390, 0.0936                                     | 0.0885, 0.1533                                     |
| goodness-of-fit                                                                            | 1.01                                                | 1.01                                               | 1.01                                               |
| (Δρ) <sub>max</sub> , (Δρ) <sub>min</sub> (e Å <sup>-3</sup> )                             | 1.10, -0.58                                         | 3.48, -1.29                                        | 1.76, -1.06                                        |
| CCDC number                                                                                | 1035243                                             | 1035242                                            | 1035244                                            |

$$^a R_1 = \Sigma ||F_o| - |F_c|| / \Sigma |F_o|. \quad wR_2 = [\Sigma w(F_o^2 - F_c^2)^2 / \Sigma w(F_o^2)^2]^{1/2}$$

**Table S2.** Selected bond lengths (Å) and angles (deg) for compounds  **$\alpha$ -Dy**,  **$\beta$ -Dy** and  **$\beta$ -Y**.

|             | <b><math>\alpha</math>-Dy</b> | <b><math>\beta</math>-Dy</b> |            | <b><math>\beta</math>-Y</b> |
|-------------|-------------------------------|------------------------------|------------|-----------------------------|
| Dy1-O1      | 2.292(2)                      | 2.287(4)                     | Y1-O1      | 2.271(4)                    |
| Dy1-O4      | 2.423(2)                      | 2.440(4)                     | Y1-O4      | 2.436(4)                    |
| Dy1-O5      | 2.472(2)                      | 2.449(4)                     | Y1-O5      | 2.435(4)                    |
| Dy1-O2A     | 2.255(2)                      | 2.265(4)                     | Y1-O2A     | 2.256(4)                    |
| Dy1-O3B     | 2.312(2)                      | 2.337(4)                     | Y1-O3B     | 2.333(4)                    |
| Dy1-O5C     | 2.425(2)                      | 2.482(4)                     | Y1-O5C     | 2.484(4)                    |
| Dy1-O1W     | 2.420(2)                      | 2.420(4)                     | Y1-O1W     | 2.402(5)                    |
| Dy1-O2W     | 2.437(2)                      | 2.420(4)                     | Y1-O2W     | 2.409(4)                    |
| O1-Dy1-O1W  | 79.97(7)                      | 79.11(15)                    | O1-Y1-O1W  | 79.26(14)                   |
| O1-Dy1-O2W  | 75.82(8)                      | 74.09(15)                    | O1-Y1-O2W  | 74.09(15)                   |
| O1-Dy1-O4   | 162.42(8)                     | 162.95(14)                   | O1-Y1-O4   | 162.87(15)                  |
| O1-Dy1-O5   | 138.45(7)                     | 139.61(13)                   | O1-Y1-O5   | 139.63(14)                  |
| O1-Dy1-O2A  | 87.88(8)                      | 97.25(15)                    | O1-Y1-O2A  | 97.21(16)                   |
| O1-Dy1-O3B  | 105.48(7)                     | 96.11(15)                    | O1-Y1-O3B  | 96.21(16)                   |
| O1-Dy1-O5C  | 78.94(7)                      | 77.41(13)                    | O1-Y1-O5C  | 77.36(14)                   |
| O1W-Dy1-O2W | 140.06(8)                     | 130.12(14)                   | O1W-Y1-O2W | 129.94(15)                  |
| O1W-Dy1-O4  | 87.97(7)                      | 84.25(13)                    | O1W-Y1-O4  | 83.99(14)                   |
| O1W-Dy1-O5  | 139.82(7)                     | 140.63(13)                   | O1W-Y1-O5  | 140.45(14)                  |
| O1W-Dy1-O2A | 74.74(8)                      | 74.18(14)                    | O1W-Y1-O2A | 74.43(16)                   |
| O1W-Dy1-O3B | 72.23(7)                      | 73.91(14)                    | O1W-Y1-O3B | 73.28(15)                   |
| O1W-Dy1-O5C | 133.42(7)                     | 140.37(13)                   | O1W-Y1-O5C | 140.59(14)                  |
| O2W-Dy1-O4  | 106.70(8)                     | 115.09(15)                   | O2W-Y1-O4  | 115.08(15)                  |
| O2W-Dy1-O5  | 74.75(7)                      | 79.48(14)                    | O2W-Y1-O5  | 79.67(14)                   |
| O2W-Dy1-O3B | 145.01(7)                     | 68.18(13)                    | O2W-Y1-O3B | 68.53(14)                   |
| O2W-Dy1-O2A | 73.10(8)                      | 149.62(14)                   | O2W-Y1-O2A | 149.61(15)                  |
| O2W-Dy1-O5C | 71.80(7)                      | 72.06(13)                    | O2W-Y1-O5C | 72.15(14)                   |
| O4-Dy1-O5   | 56.90(7)                      | 57.41(12)                    | O4-Y1-O5   | 57.47(14)                   |
| O4-Dy1-O2A  | 76.56(9)                      | 81.52(15)                    | O4-Y1-O2A  | 81.60(15)                   |
| O4-Dy1-O3B  | 82.61(8)                      | 75.63(14)                    | O4-Y1-O3B  | 75.36(15)                   |
| O4-Dy1-O5C  | 118.55(7)                     | 118.54(13)                   | O4-Y1-O5C  | 118.67(14)                  |
| O5-Dy1-O2A  | 110.52(8)                     | 90.33(14)                    | O5-Y1-O2A  | 90.15(15)                   |
| O5-Dy1-O3B  | 83.47(7)                      | 101.81(13)                   | O5-Y1-O3B  | 102.11(14)                  |
| O5-Dy1-O5C  | 64.38(6)                      | 65.56(15)                    | O5-Y1-O5C  | 65.57(13)                   |
| O2A-Dy1-O3B | 141.28(8)                     | 142.20(14)                   | O2A-Y1-O3B | 141.86(14)                  |
| O3B-Dy1-O5C | 74.18(7)                      | 139.94(13)                   | O3B-Y1-O5C | 140.38(14)                  |
| O2A-Dy1-O5C | 144.54(8)                     | 77.65(14)                    | O2A-Y1-O5C | 77.56(14)                   |
| Dy1-O5-Dy1C | 115.62(8)                     | 114.435(11)                  | Y1-O5-Y1C  | 114.43(16)                  |

Symmetry transformations used to generate equivalent atoms for  **$\alpha$ -Dy**: A: -x+1, y+1/2, -z+1/2; B: -x+1, y-1/2, -z+1/2; C: -x+1, -y, -z+1. For  **$\beta$ -Dy** and  **$\beta$ -Y**: A: -x+1, -y+1, -z+1; B: -x, -y+1, -z+1; C: -x+1, -y+2, -z+1.

**Table S3.** Hydrogen bond lengths (Å) and angles (deg) for compounds  **$\alpha$ -Dy** and  **$\beta$ -Dy**.

|                                           | D-H...A                      | $d(\text{D-H})$ | $d(\text{H}\cdots\text{A})$ | $d(\text{D}\cdots\text{A})$ | $\angle \text{DHA}$ |
|-------------------------------------------|------------------------------|-----------------|-----------------------------|-----------------------------|---------------------|
| <b><math>\alpha</math>-Dy<sup>a</sup></b> | O1W-H1Wa...O1 <sup>iii</sup> | 0.8500          | 2.1100                      | 2.898(3)                    | 154.00              |
|                                           | O1W-H1Wb...O6 <sup>iv</sup>  | 0.8500          | 1.9800                      | 2.765(4)                    | 153.00              |
|                                           | O2W-H2Wa...O7 <sup>ii</sup>  | 0.8500          | 2.3700                      | 2.946(4)                    | 125.00              |
|                                           | O2W-H2Wb...O3 <sup>i</sup>   | 0.8500          | 2.0500                      | 2.831(3)                    | 151.00              |
|                                           | N1-H1a...O7 <sup>ii</sup>    | 0.8600          | 1.9300                      | 2.758(4)                    | 160.00              |
|                                           | C5-H5...O6 <sup>v</sup>      | 0.9300          | 2.5100                      | 3.312(4)                    | 145.00              |
| <b><math>\beta</math>-Dy<sup>b</sup></b>  | C6-H6...O4 <sup>vi</sup>     | 0.9300          | 2.5100                      | 3.143(5)                    | 126.00              |
|                                           | O1W-H1Wa...O6 <sup>ii</sup>  | 0.8600          | 1.8600                      | 2.711(6)                    | 169.00              |
|                                           | O1W-H1Wb...O1 <sup>i</sup>   | 0.8600          | 2.2000                      | 2.909(6)                    | 139.00              |
|                                           | O2W-H2Wa...O7 <sup>iv</sup>  | 0.8600          | 2.4200                      | 2.714(6)                    | 101.00              |
|                                           | O2W-H2Wb...O2 <sup>iii</sup> | 0.8600          | 2.4400                      | 3.243(6)                    | 155.00              |
|                                           | N1-H1a...O7 <sup>iv</sup>    | 0.8600          | 1.9800                      | 2.799(6)                    | 160.00              |
|                                           | C5-H5...O6 <sup>v</sup>      | 0.9300          | 2.4400                      | 3.234(9)                    | 143.00              |
|                                           | C6-H6...O4 <sup>vi</sup>     | 0.9300          | 2.4900                      | 3.164(8)                    | 129.00              |

<sup>a</sup>Symmetry codes: i, x, 1/2-y, 1/2+z; ii, 1-x, -y, 1-z; iii, 1-x, -1/2+y, 1/2-z; iv, x, 1/2-y, -1/2+z; v, 1+x, 1/2-y, -1/2+z; vi, 1+x, y, z.

<sup>b</sup>Symmetry codes: i, -x, 1-y, 1-z; ii, x, -1+y, z; iii, x, 1+y, z; iv, 1-x, 2-y, 1-z; v, x, -1+y, 1+z; vi, x, y, 1+z.

**Table S4.** The parameters obtained by fitting the  $\chi_M''$  versus frequency data for compound  **$\alpha$ -Dy** in different  $dc$  fields at 5 K.

| H /<br>kOe | $\chi_T' /$<br>$\text{cm}^3 \cdot \text{mol}^{-1}$ | $\chi_S' / \text{cm}^3 \cdot \text{mol}^{-1}$ | $\ln(\tau_A / \text{s})$ | $\alpha_A$ | $\ln(\tau_B / \text{s})$ | $\alpha_B$ | $f_A$ | $R^a$                |
|------------|----------------------------------------------------|-----------------------------------------------|--------------------------|------------|--------------------------|------------|-------|----------------------|
| 1.0        | 2.31                                               | 1.65                                          | -4.17                    | 0.20       | -9.47                    | 0.24       | 0.19  | $4.2 \times 10^{-6}$ |
| 1.5        | 2.21                                               | 1.19                                          | -3.72                    | 0.17       | -8.79                    | 0.33       | 0.18  | $3.1 \times 10^{-5}$ |
| 2.0        | 2.14                                               | 0.95                                          | -3.63                    | 0.29       | -8.39                    | 0.31       | 0.28  | $8.1 \times 10^{-6}$ |
| 2.5        | 2.06                                               | 0.76                                          | -3.45                    | 0.28       | -8.24                    | 0.32       | 0.34  | $2.5 \times 10^{-5}$ |
| 3.0        | 2.02                                               | 0.64                                          | -3.19                    | 0.34       | -8.24                    | 0.30       | 0.45  | $1.3 \times 10^{-5}$ |

$$^a R = \sum [(\chi'_{obs} - \chi'_{cal})^2 + (\chi''_{obs} - \chi''_{cal})^2] / \sum [\chi'^2_{obs} + \chi''^2_{obs}]$$

**Table S5.** The parameters obtained by fitting the  $\chi_M''$  versus frequency data for compound  **$\alpha$ -Dy** under 2 kOe *dc* field.

| $T/K$ | $\chi_T / \text{cm}^3 \cdot \text{mol}^{-1}$ | $\chi_S / \text{cm}^3 \cdot \text{mol}^{-1}$ | $\ln(\tau_B / \text{s})$ | $\alpha_B$ | $\ln(\tau_A / \text{s})$ | $\alpha_A$ | $f_B$ | $R^b$                |
|-------|----------------------------------------------|----------------------------------------------|--------------------------|------------|--------------------------|------------|-------|----------------------|
| 2.0   | 0.20                                         | 0.02                                         | -0.48                    | 0.20       | -8.21                    | 0.46       | 0.72  | $2.6 \times 10^{-4}$ |
| 2.5   | 0.20                                         | 0.02                                         | -1.09                    | 0.14       | -8.11                    | 0.55       | 0.66  | $2.6 \times 10^{-5}$ |
| 3.0   | 0.20                                         | 0.02                                         | -1.47                    | 0.19       | -8.14                    | 0.56       | 0.61  | $1.7 \times 10^{-4}$ |
| 3.5   | 0.17                                         | 0 <sup>a</sup>                               | -2.15                    | 0.07       | -7.84                    | 0.72       | 0.31  | $3.2 \times 10^{-4}$ |
| 4.0   | 0.16                                         | 0.02                                         | -2.35                    | 0.30       | -8.09                    | 0.55       | 0.47  | $1.2 \times 10^{-5}$ |
| 4.5   | 0.14                                         | 0.03                                         | -3.05                    | 0.30       | -8.09                    | 0.42       | 0.45  | $2.9 \times 10^{-5}$ |
| 5.0   | 0.12                                         | 0.03                                         | -3.46                    | 0.26       | -8.33                    | 0.38       | 0.37  | $2.6 \times 10^{-5}$ |
| 6.0   | 0.10                                         | 0.03                                         | -4.42                    | 0.34       | -8.92                    | 0.18       | 0.36  | $2.3 \times 10^{-5}$ |
| 7.0   | 0.08                                         | 0.04                                         | -5.91                    | 0.28       | -9.36                    | 0.06       | 0.31  | $7.6 \times 10^{-6}$ |
| 8.0   | 0.07                                         | 0.03                                         |                          |            | -9.97                    | 0.47       |       | $1.9 \times 10^{-5}$ |
| 9.0   | 0.06                                         | 0.03                                         |                          |            | -10.59                   | 0.33       |       | $1.7 \times 10^{-5}$ |
| 10.0  | 0.06                                         | 0.03                                         |                          |            | -10.98                   | 0.18       |       | $1.7 \times 10^{-6}$ |

<sup>a</sup>This parameter value is fixed to zero. <sup>b</sup> $R = \sum[(\chi'_{obs} - \chi'_{cal})^2 + (\chi''_{obs} - \chi''_{cal})^2] / \sum[\chi'^2_{obs} + \chi''^2_{obs}]$

**Table S6.** The parameters obtained by fitting the  $\chi_M''$  versus frequency data for compound  **$\alpha$ -Dy<sub>0.10</sub>Y<sub>0.90</sub>** under 2 kOe *dc* field.

| $T/K$ | $\chi_T / \text{cm}^3 \cdot \text{mol}^{-1}$ | $\chi_S / \text{cm}^3 \cdot \text{mol}^{-1}$ | $\ln(\tau / \text{s})$ | $\alpha$ | $R^a$                |
|-------|----------------------------------------------|----------------------------------------------|------------------------|----------|----------------------|
| 2.0   | 0.016                                        | 0.001                                        | -4.32                  | 0.39     | $2.4 \times 10^{-4}$ |
| 2.5   | 0.015                                        | 0.001                                        | -4.53                  | 0.40     | $2.7 \times 10^{-4}$ |
| 3.0   | 0.013                                        | 0.001                                        | -4.81                  | 0.39     | $1.9 \times 10^{-4}$ |
| 3.5   | 0.011                                        | 0.002                                        | -5.13                  | 0.37     | $2.4 \times 10^{-4}$ |
| 4.0   | 0.010                                        | 0.002                                        | -5.48                  | 0.36     | $1.3 \times 10^{-4}$ |
| 4.5   | 0.009                                        | 0.002                                        | -5.89                  | 0.34     | $7.7 \times 10^{-5}$ |
| 5.0   | 0.008                                        | 0.002                                        | -6.30                  | 0.33     | $7.9 \times 10^{-4}$ |
| 6.0   | 0.007                                        | 0.002                                        | -7.19                  | 0.31     | $4.8 \times 10^{-5}$ |
| 7.0   | 0.006                                        | 0.002                                        | -7.97                  | 0.32     | $6.5 \times 10^{-5}$ |
| 8.0   | 0.005                                        | 0.003                                        | -8.46                  | 0.25     | $2.8 \times 10^{-5}$ |
| 9.0   | 0.005                                        | 0.003                                        | -8.75                  | 0.23     | $3.4 \times 10^{-5}$ |
| 10.0  | 0.004                                        | 0.003                                        | -9.25                  | 0.30     | $2.0 \times 10^{-5}$ |

<sup>a</sup> $R = \sum[(\chi'_{obs} - \chi'_{cal})^2 + (\chi''_{obs} - \chi''_{cal})^2] / \sum[\chi'^2_{obs} + \chi''^2_{obs}]$

**Table S7.** The parameters obtained by fitting the  $\chi_M''$  versus frequency data for compound  **$\beta$ -Dy** under 2 kOe *dc* field.

| <i>T</i> /K | $\chi_T / \text{cm}^3 \cdot \text{mol}^{-1}$ | $\chi_S / \text{cm}^3 \cdot \text{mol}^{-1}$ | $\ln(\tau / \text{s})$ | $\alpha$ | $R^a$                |
|-------------|----------------------------------------------|----------------------------------------------|------------------------|----------|----------------------|
| 3.5         | 0.20                                         | 0.01                                         | -4.90                  | 0.59     | $1.4 \times 10^{-5}$ |
| 4.0         | 0.19                                         | 0.01                                         | -5.02                  | 0.59     | $7.7 \times 10^{-5}$ |
| 4.5         | 0.18                                         | 0.01                                         | -5.04                  | 0.57     | $1.4 \times 10^{-4}$ |
| 5.0         | 0.16                                         | 0.01                                         | -5.27                  | 0.55     | $1.3 \times 10^{-3}$ |
| 6.0         | 0.13                                         | 0.03                                         | -5.72                  | 0.33     | $2.3 \times 10^{-4}$ |
| 7.0         | 0.11                                         | 0.03                                         | -6.43                  | 0.25     | $7.5 \times 10^{-4}$ |
| 8.0         | 0.09                                         | 0.03                                         | -7.52                  | 0.17     | $5.0 \times 10^{-5}$ |
| 9.0         | 0.08                                         | 0.02                                         | -8.80                  | 0.12     | $8.8 \times 10^{-4}$ |
| 10.0        | 0.07                                         | 0.02                                         | -9.98                  | 0.03     | $3.6 \times 10^{-5}$ |

$$^a R = \sum[(\chi'_{obs} - \chi'_{cal})^2 + (\chi''_{obs} - \chi''_{cal})^2] / \sum[\chi'^2_{obs} + \chi''^2_{obs}]$$

**Table S8.** The parameters obtained by fitting the  $\chi_M''$  versus frequency data for compound  **$\beta$ -Dy<sub>0.12</sub>Y<sub>0.88</sub>** under zero *dc* field.

| <i>T</i> /K | $\chi_T / \text{cm}^3 \cdot \text{mol}^{-1}$ | $\chi_S / \text{cm}^3 \cdot \text{mol}^{-1}$ | $\ln(\tau / \text{s})$ | $\alpha$ | $R^a$                |
|-------------|----------------------------------------------|----------------------------------------------|------------------------|----------|----------------------|
| 6           | 2.65                                         | 1.35                                         | -6.07                  | 0.26     | $8.0 \times 10^{-5}$ |
| 7           | 2.27                                         | 0.90                                         | -7.24                  | 0.25     | $2.0 \times 10^{-4}$ |
| 8           | 1.96                                         | 0.84                                         | -8.27                  | 0.11     | $7.4 \times 10^{-5}$ |
| 9           | 1.74                                         | 0.78                                         | -9.60                  | 0.08     | $5.3 \times 10^{-5}$ |
| 10          | 1.56                                         | 1.16                                         | -10.50                 | 0.12     | $1.6 \times 10^{-5}$ |

**Table S9.** The parameters obtained by fitting the  $\chi_M''$  versus frequency data for compound  **$\beta$ -Dy<sub>0.10</sub>Y<sub>0.90</sub>** under 2 kOe *dc* field.

| <i>T</i> /K | $\chi_T / \text{cm}^3 \cdot \text{mol}^{-1}$ | $\chi_S / \text{cm}^3 \cdot \text{mol}^{-1}$ | $\ln(\tau / \text{s})$ | $\alpha$ | $R^a$                |
|-------------|----------------------------------------------|----------------------------------------------|------------------------|----------|----------------------|
| 2           | 6.94                                         | 0.16                                         | -0.96                  | 0.41     | $5.0 \times 10^{-3}$ |
| 3           | 6.5                                          | 0.23                                         | -0.83                  | 0.40     | $5.6 \times 10^{-3}$ |
| 4           | 5.02                                         | 0.22                                         | -1.34                  | 0.36     | $5.2 \times 10^{-3}$ |
| 5           | 3.39                                         | 0.26                                         | -2.75                  | 0.20     | $3.0 \times 10^{-3}$ |
| 6           | 2.54                                         | 0.26                                         | -4.28                  | 0.10     | $2.5 \times 10^{-3}$ |
| 7           | 2.19                                         | 0.26                                         | -5.86                  | 0.07     | $9.7 \times 10^{-4}$ |
| 8           | 1.93                                         | 0.28                                         | -7.52                  | 0.07     | $4.5 \times 10^{-4}$ |
| 9           | 1.71                                         | 0.29                                         | -9.23                  | 0.10     | $1.1 \times 10^{-4}$ |
| 10          | 1.55                                         | 0.80                                         | -10.56                 | 0.21     | $7.3 \times 10^{-5}$ |

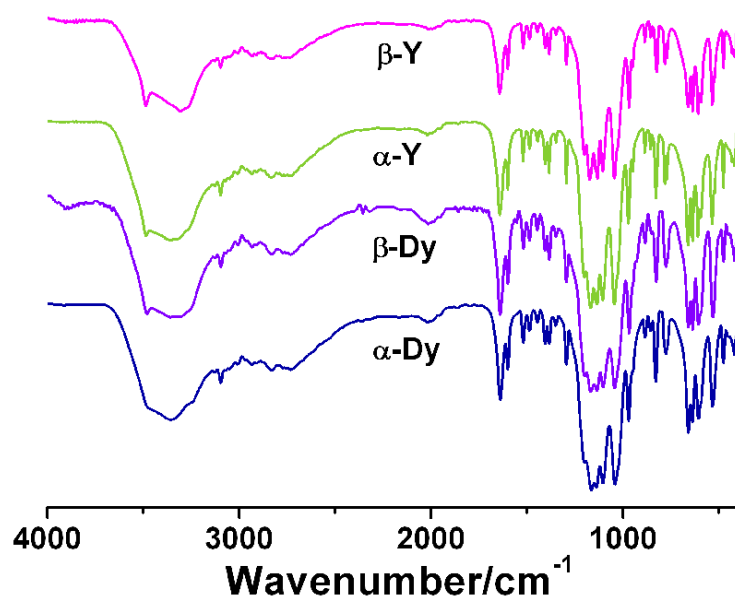

**Figure S1.** IR spectra for for  $\alpha$ -Dy,  $\alpha$ -Y,  $\beta$ -Dy and  $\beta$ -Y.

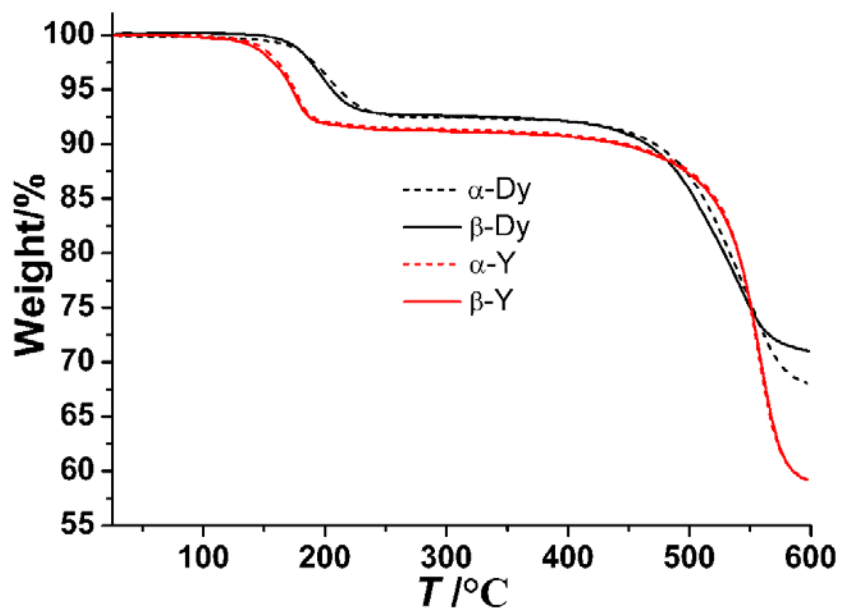

**Figure S2.** TG curves for  $\alpha$ -Dy,  $\alpha$ -Y,  $\beta$ -Dy and  $\beta$ -Y.

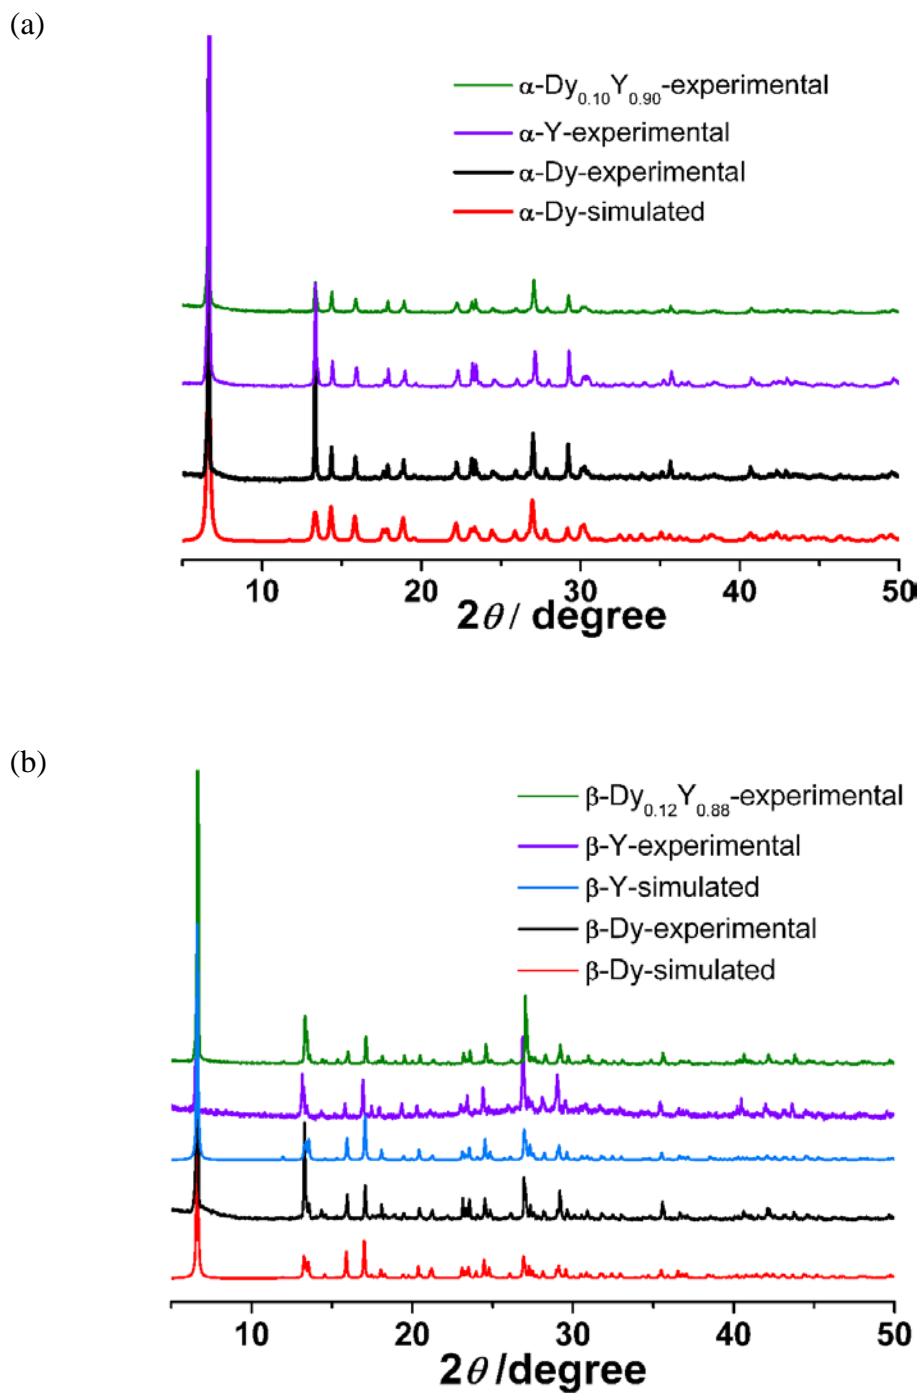

**Figure S3.** The powder XRD patterns for compounds  $\alpha\text{-Dy}$ ,  $\alpha\text{-Y}$ ,  $\alpha\text{-Dy}_{0.10}\text{Y}_{0.90}$  (a) and  $\beta\text{-Dy}$ ,  $\beta\text{-Y}$ ,  $\beta\text{-Dy}_{0.12}\text{Y}_{0.88}$  (b). The patterns simulated from the single crystal data of  $\alpha\text{-Dy}$  and  $\beta\text{-Dy}$  are also given.

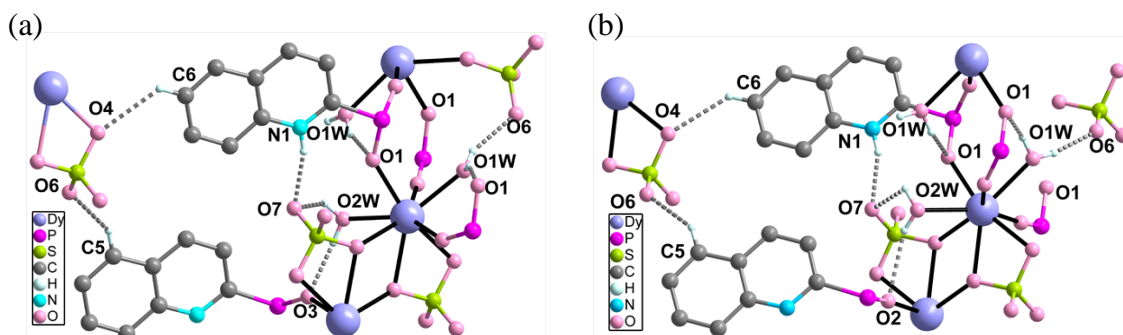

**Figure S4.** Intra- and inter-layer hydrogen-bond interactions in  $\alpha$ -Dy (a) and  $\beta$ -Dy (b).

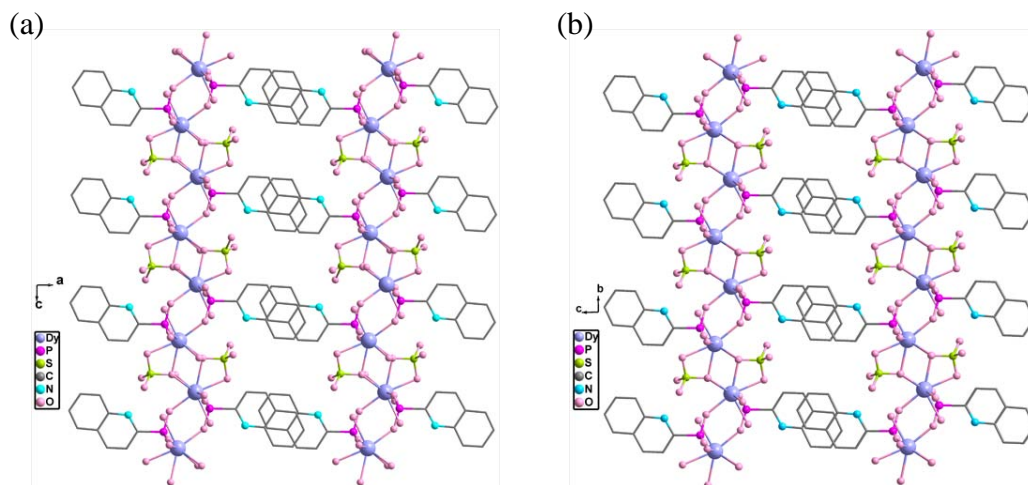

**Figure S5.** Packing diagrams of structures  $\alpha$ -Dy viewed along the  $b$ -axis (a), and  $\beta$ -Dy viewed along the  $a$ -axis (b). All H atoms are omitted for clarity.

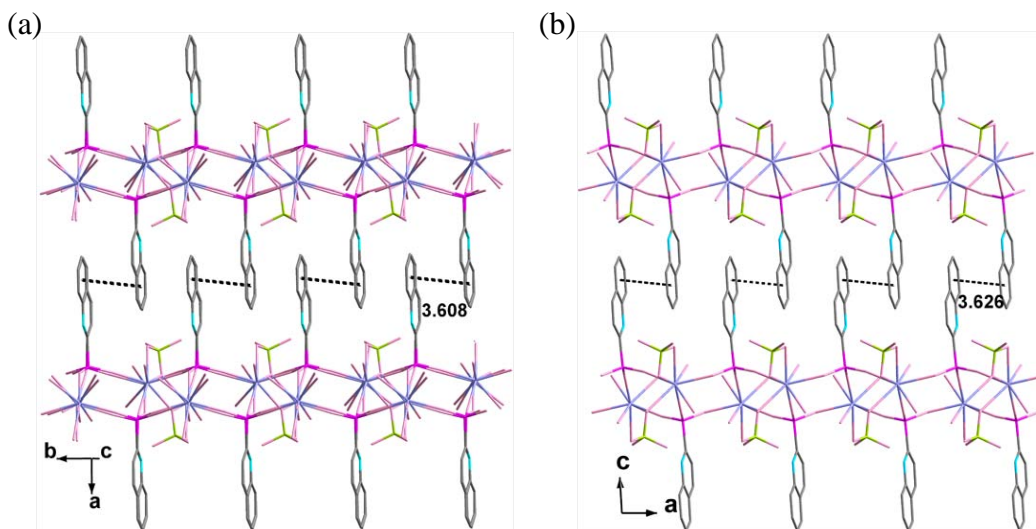

**Figure S6.** The inter-layer  $\pi$ - $\pi$  stackings in structures  $\alpha$ -Dy (a) and  $\beta$ -Dy (b).

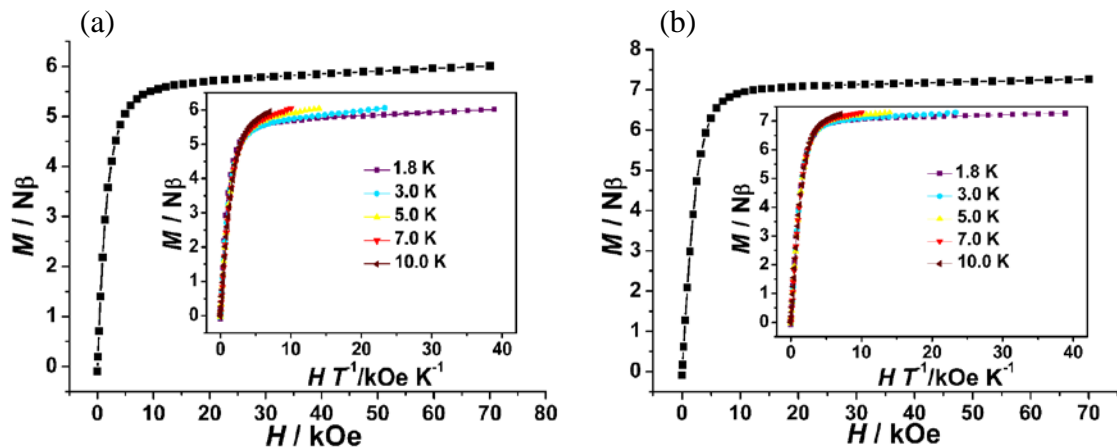

**Figure S7.** Field dependence of magnetization for  $\alpha$ -Dy (a) and  $\beta$ -Dy (b) measured at 1.8 K. Inset:  $M$  vs.  $H/T$  plots for  $\alpha$ -Dy (a) and  $\beta$ -Dy (b) at indicated temperatures.

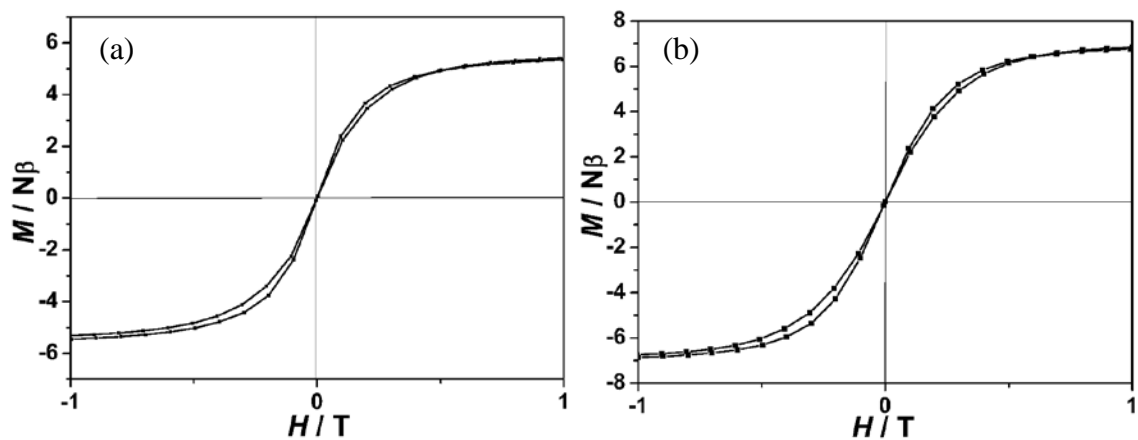

**Figure S8.** Hysteresis loops for  $\alpha$ -Dy (a) and  $\beta$ -Dy (b) measured at 1.8 K with a sweep rate of 500 Oe/s.

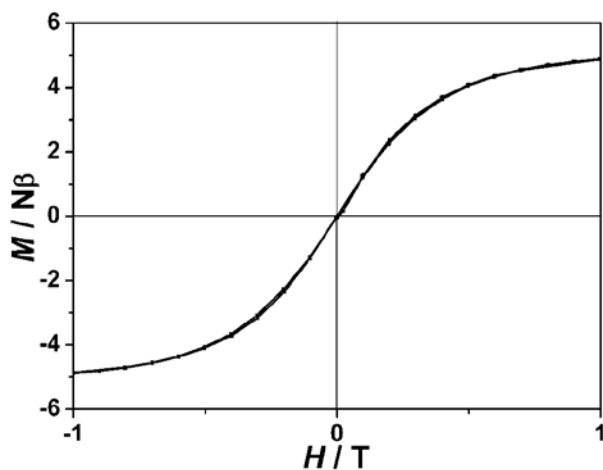

**Figure S9.** Hysteresis loop for  $\alpha$ -Dy<sub>0.10</sub>Y<sub>0.90</sub> at 1.8 K with a sweep rate of 500 Oe/s.

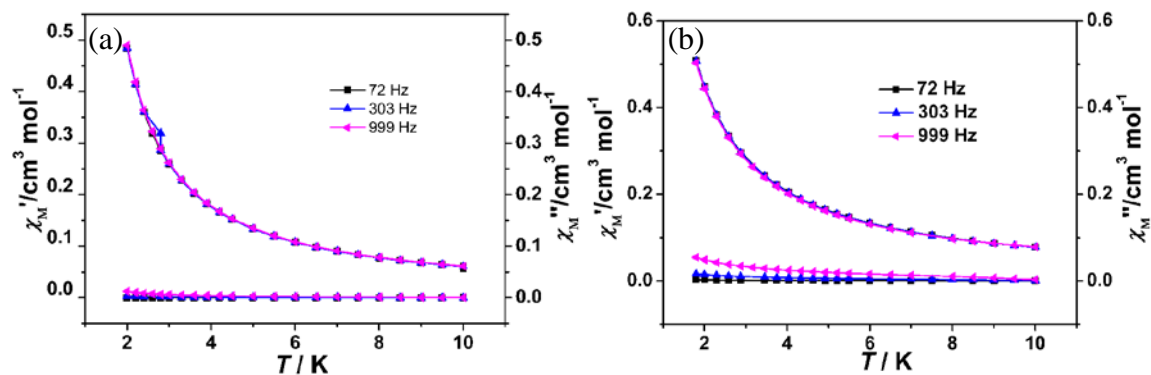

**Figure S10.** Temperature dependent in-phase ( $\chi_M'$ ) and out-of-phase ( $\chi_M''$ ) signals for compounds  $\alpha$ -Dy (a) and  $\beta$ -Dy (b) at zero  $dc$  field.

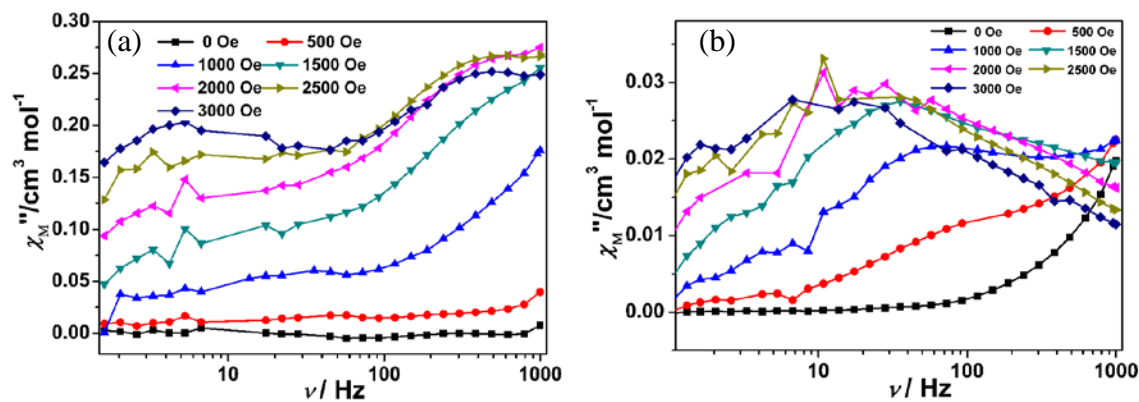

**Figure S11.** Frequency dependence of the out-of-phase susceptibilities of compounds  $\alpha$ -Dy (a) and  $\beta$ -Dy (b) at 5 K under different  $dc$  fields.

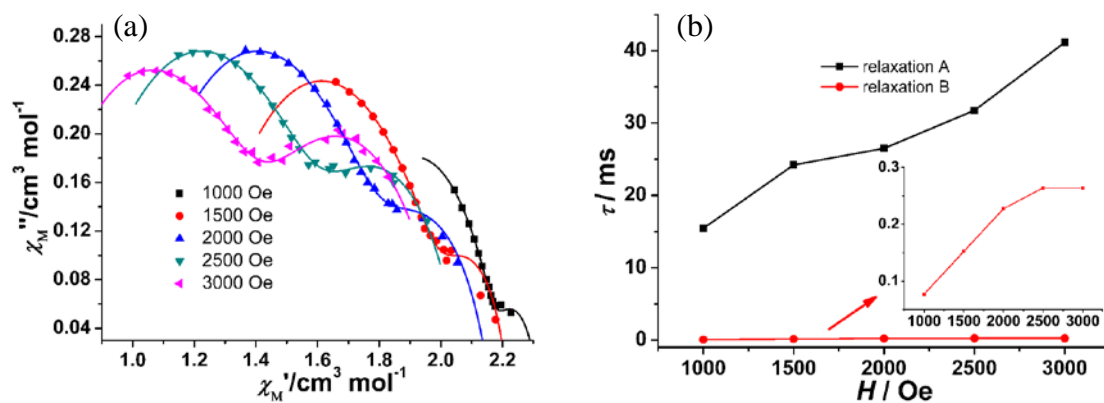

**Figure S12.** (a) Cole-Cole plots for  $\alpha$ -Dy obtained using the  $ac$  susceptibility data at 5 K under different  $dc$  fields. (b) Field dependent magnetic relaxation time at 5 K for  $\alpha$ -Dy.

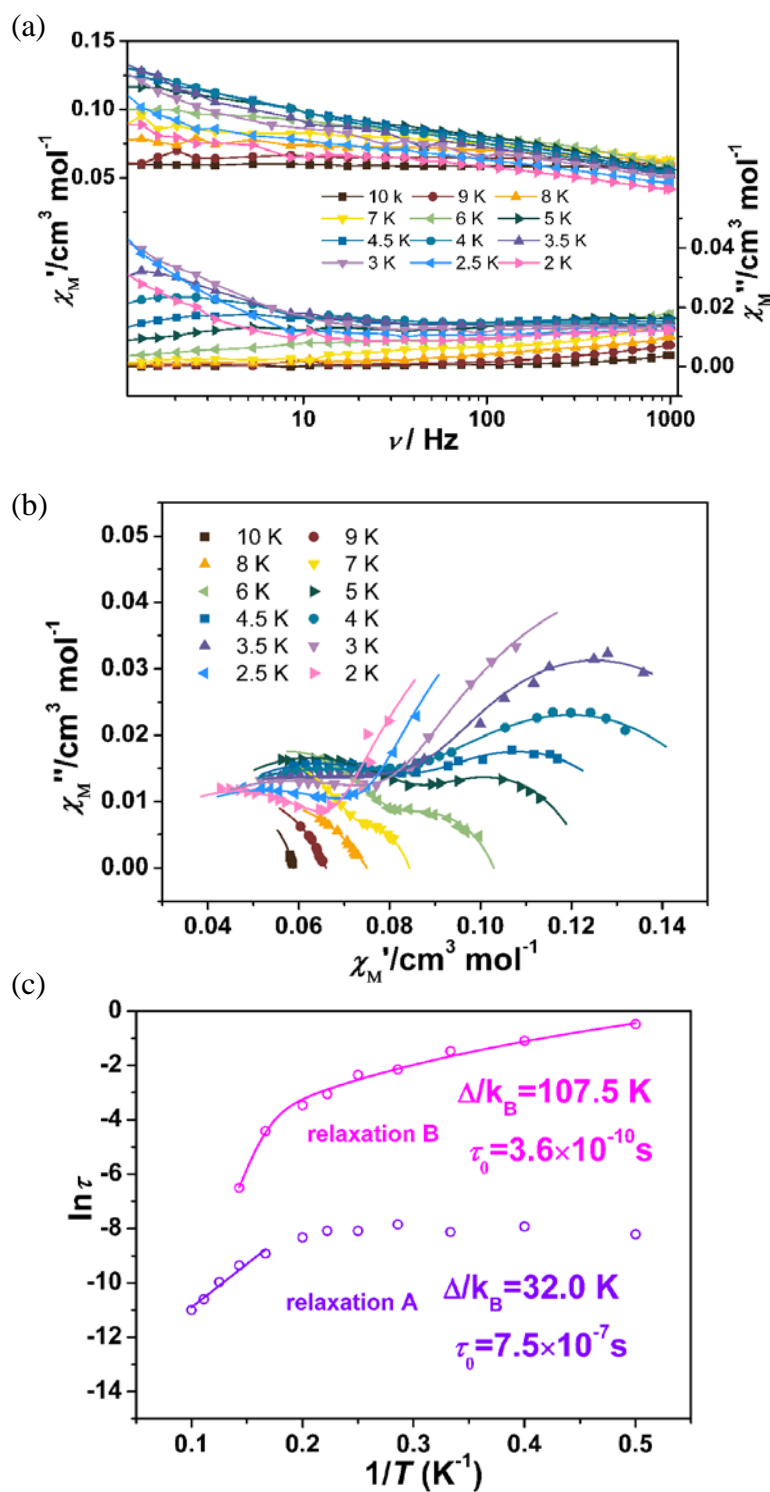

**Figure S13.** The  $\chi_M'$  and  $\chi_M''$  versus frequency plots (a), Cole-Cole plots (b) and  $\ln(\tau)$  versus  $T^{-1}$  plots for  $\alpha$ -Dy under 2 kOe *dc* field. The solid lines are either eye-guided (a) or best fits (b, c).

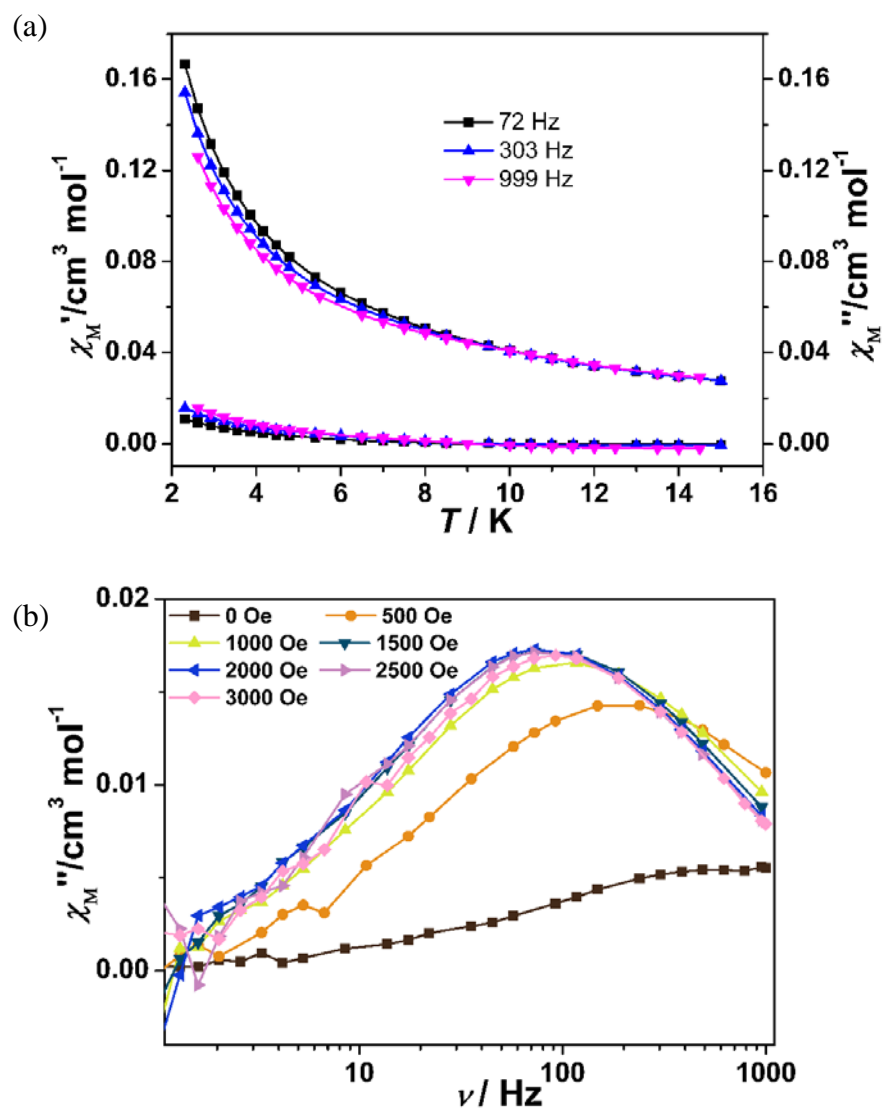

**Figure S14.** (a) Temperature dependent in-phase ( $\chi_M'$ ) and out-of-phase ( $\chi_M''$ ) signals for compound  $\alpha\text{-Dy}_{0.10}\text{Y}_{0.90}$  under zero  $dc$  field. (b) Frequency dependence of the out-of-phase susceptibility of compound  $\alpha\text{-Dy}_{0.10}\text{Y}_{0.90}$  at 5 K under different  $dc$  fields.

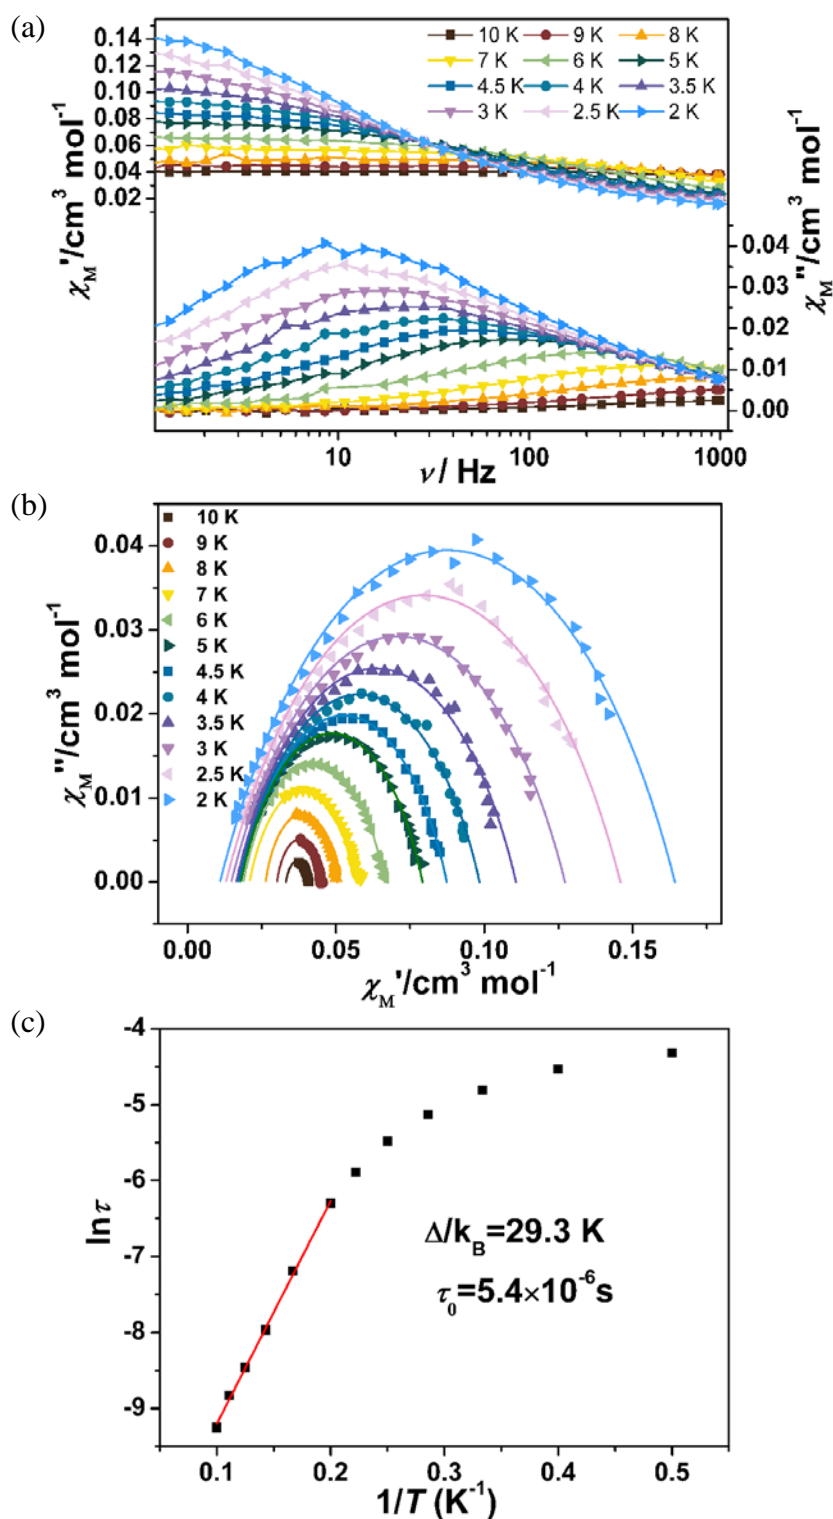

**Figure S15.**  $\chi_M'$  and  $\chi_M''$  versus  $\nu$  plots (a), Cole-Cole plots (b) and  $\ln(\tau)$  versus  $T^{-1}$  plot (c) for compound  $\alpha\text{-Dy}_{0.10}\text{Y}_{0.90}$  under 2 kOe  $dc$  field. The solid lines are eye-guided (a) or best fits (b, c).

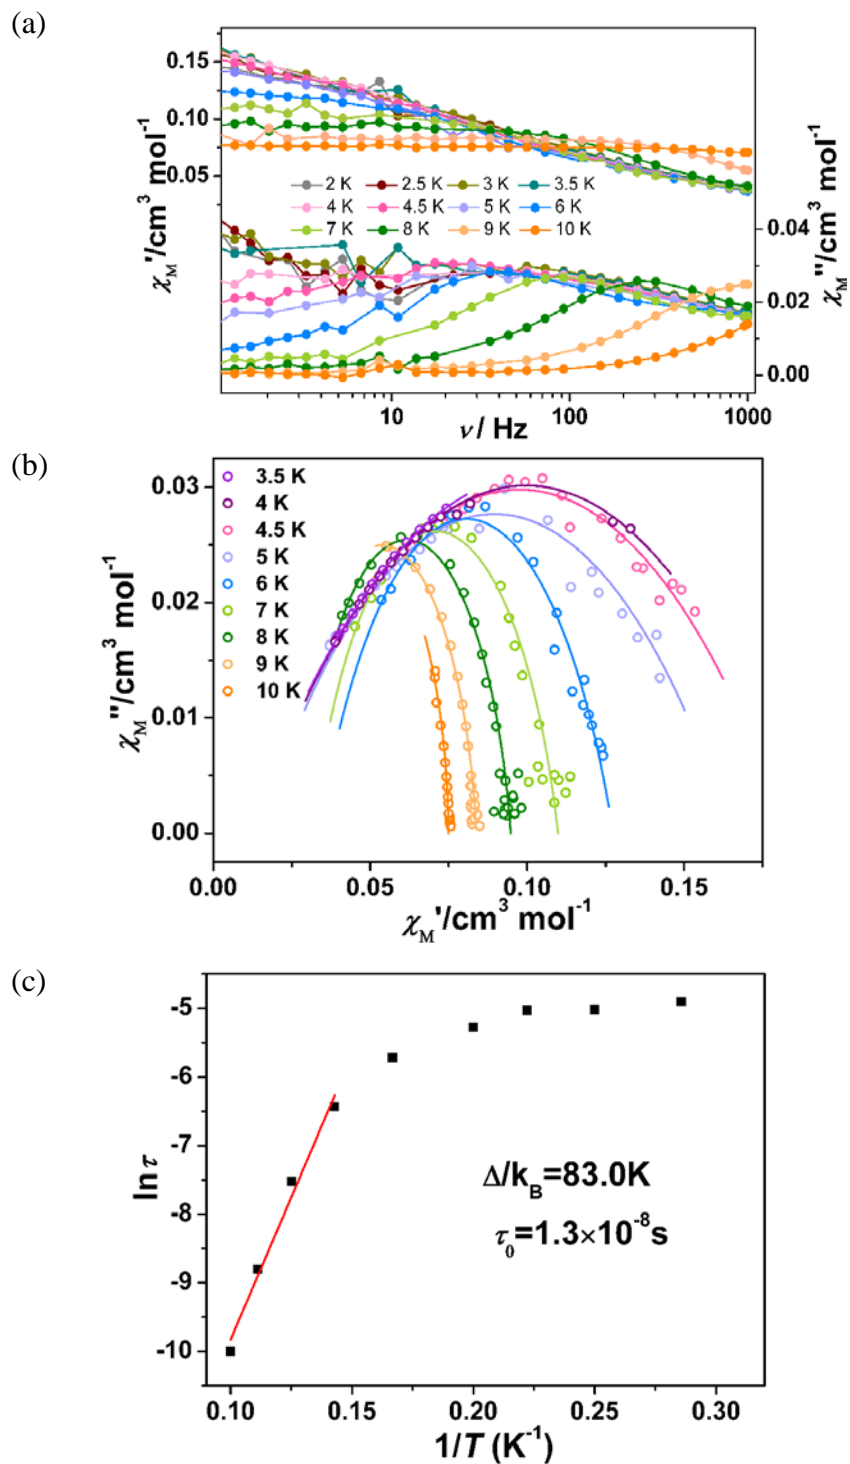

**Figure S16.** The  $\chi_M'$  and  $\chi_M''$  versus frequency plots (a), Cole-Cole plots (b) and  $\ln(\tau)$  versus  $T^{-1}$  plot for  $\beta$ -Dy under 2 kOe *dc* field. The solid lines are eye-guided (a) or best fits (b, c).

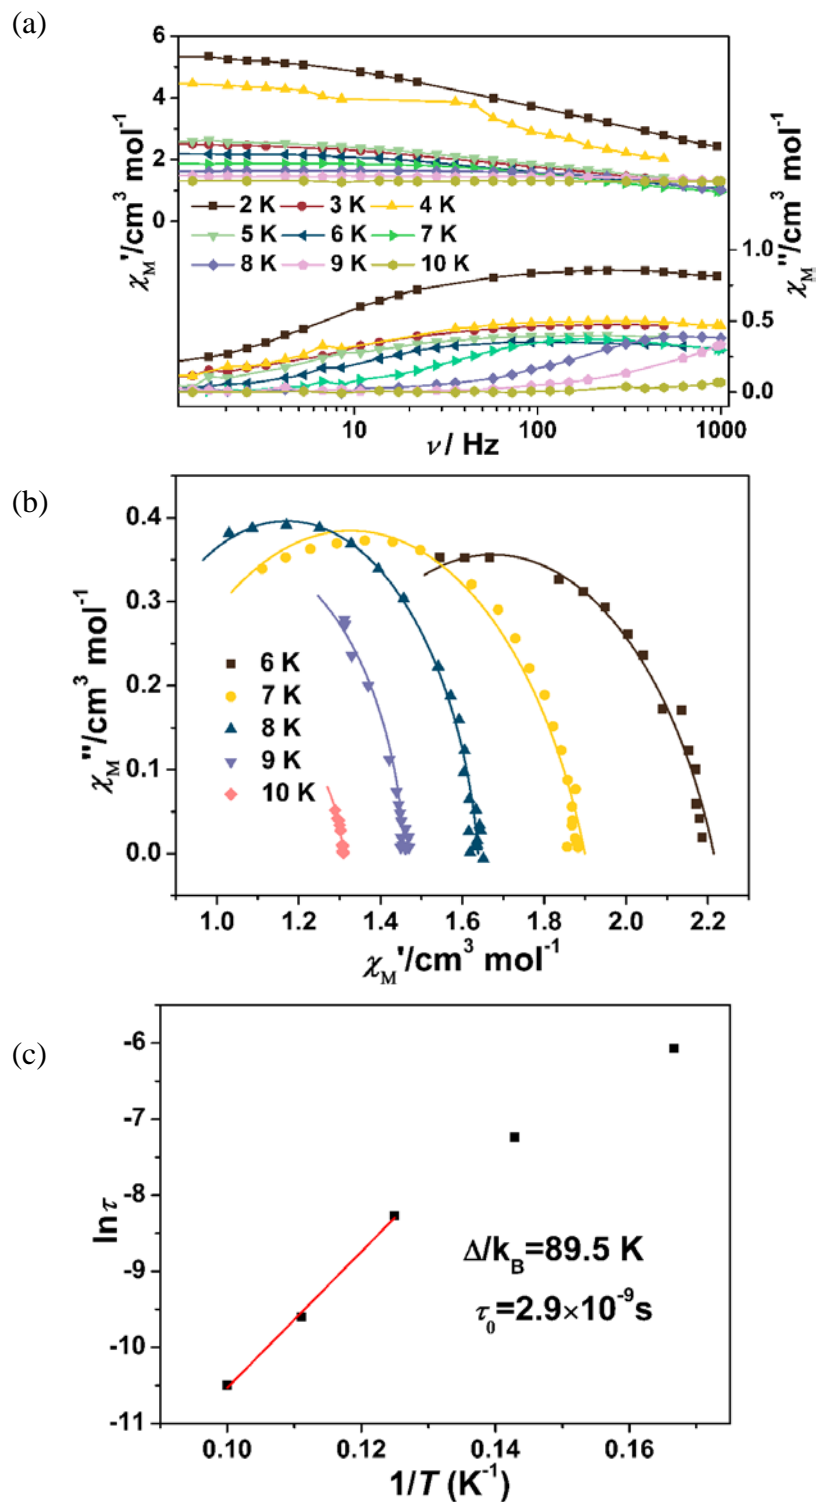

**Figure S17.** Frequency dependent in-phase ( $\chi_M'$ ) and out-of-phase ( $\chi_M''$ ) signals (a), Cole-Cole plots (b) and the  $\ln(\tau)$  versus  $T^{-1}$  plot (c) for  $\beta\text{-Dy}_{0.12}\text{Y}_{0.88}$  at zero  $dc$  field. The solid lines are eye-guided (a) or best fits (b,c).

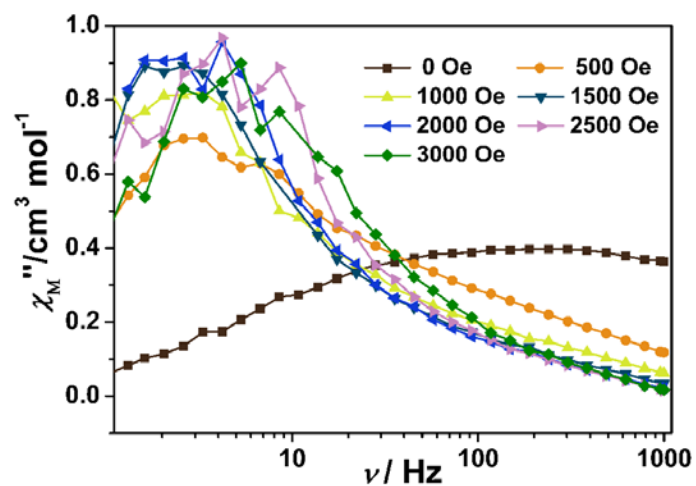

**Figure S18.** Frequency dependence of the out-of-phase susceptibility of  $\beta\text{-Dy}_{0.12}\text{Y}_{0.88}$  at 5 K under different dc fields.

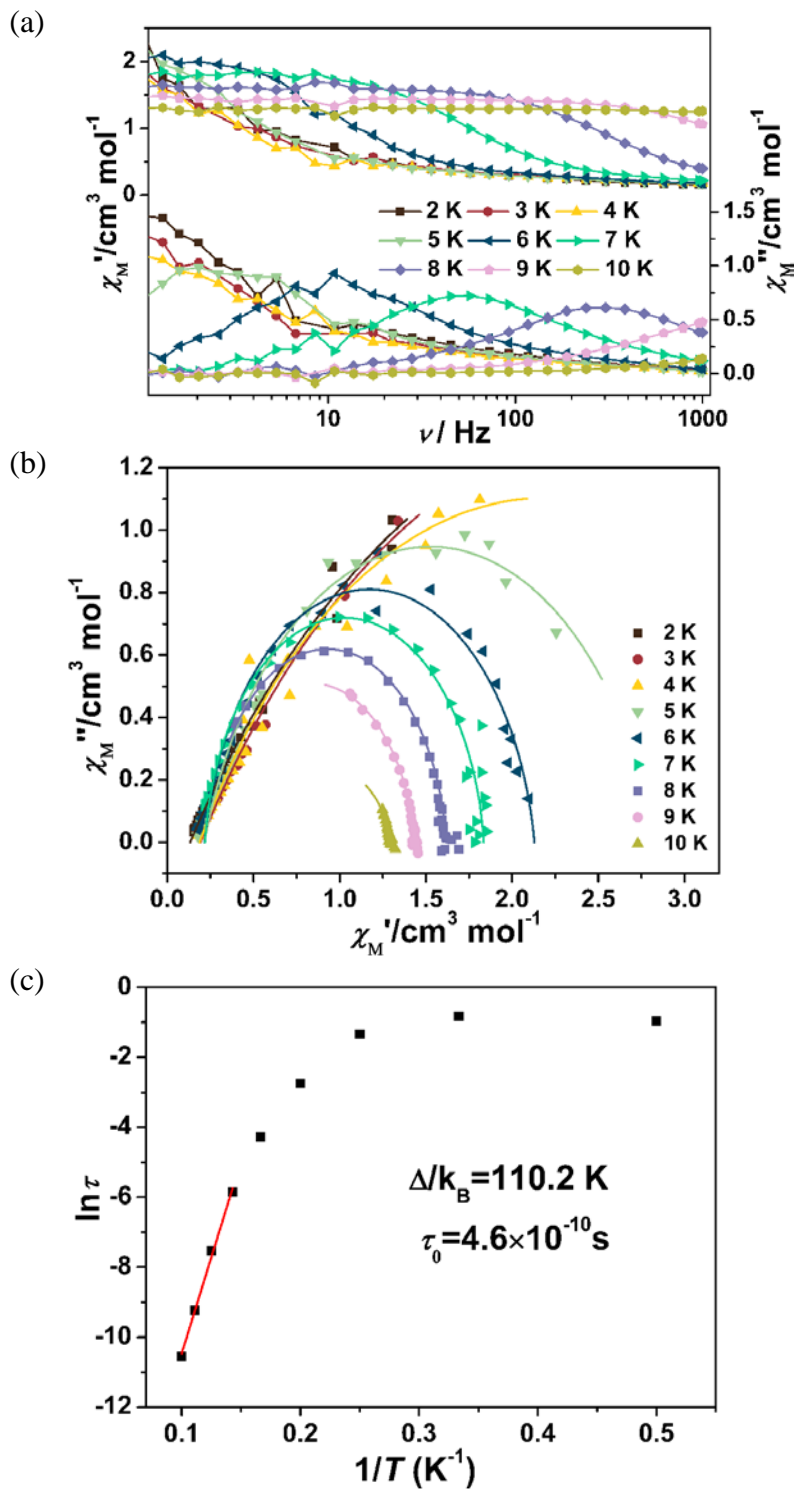

**Figure S19.** Frequency dependent in-phase ( $\chi_M'$ ) and out-of-phase ( $\chi_M''$ ) signals (a), Cole-Cole plots (b) and the  $\ln(\tau)$  versus  $T^{-1}$  plot (c) for  $\beta\text{-Dy}_{0.12}\text{Y}_{0.88}$  at 2 kOe *dc* field. The solid lines are eye-guided (a) or best fits (b,c).

(a)

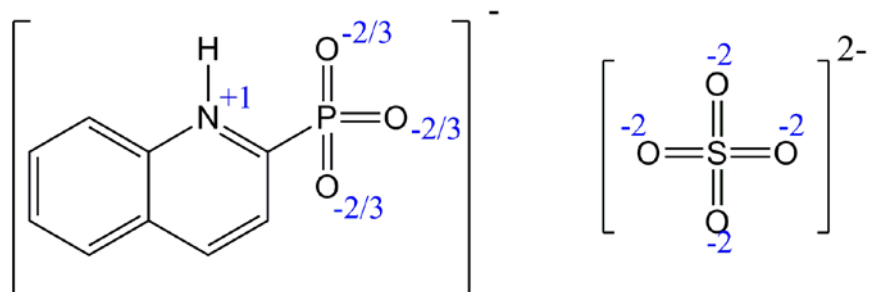

(b)

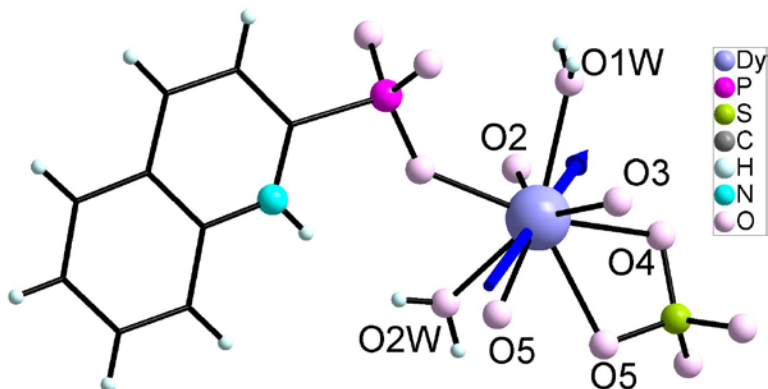

(c)

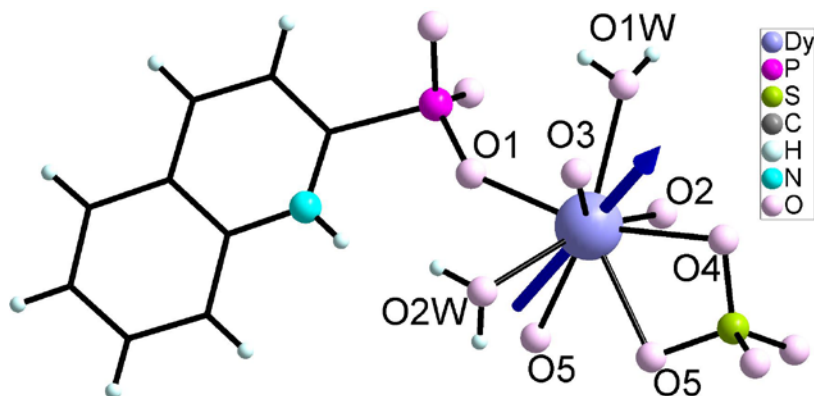

**Figure S20.** The orientation of the magnetic anisotropy is estimated by using MAGELLAN software. The 2-qpH<sup>-</sup> ligand, SO<sub>4</sub><sup>2-</sup> anion, five neighboring Dy<sup>3+</sup> ions bridged via  $\mu_3$ -O or O-P-O units are considered in the calculation. (a) The partial charges of the 2-qpH<sup>-</sup> and SO<sub>4</sub><sup>2-</sup> ligands; (b) The calculated easy-axis (blue arrow) in  $\alpha$ -Dy; (c) The calculated easy-axis (blue arrow) in  $\beta$ -Dy. The direction of the arrow heads is arbitrary.
